# Supplementary material
Source: PubMed Central journal article supplement (PMC3236679)

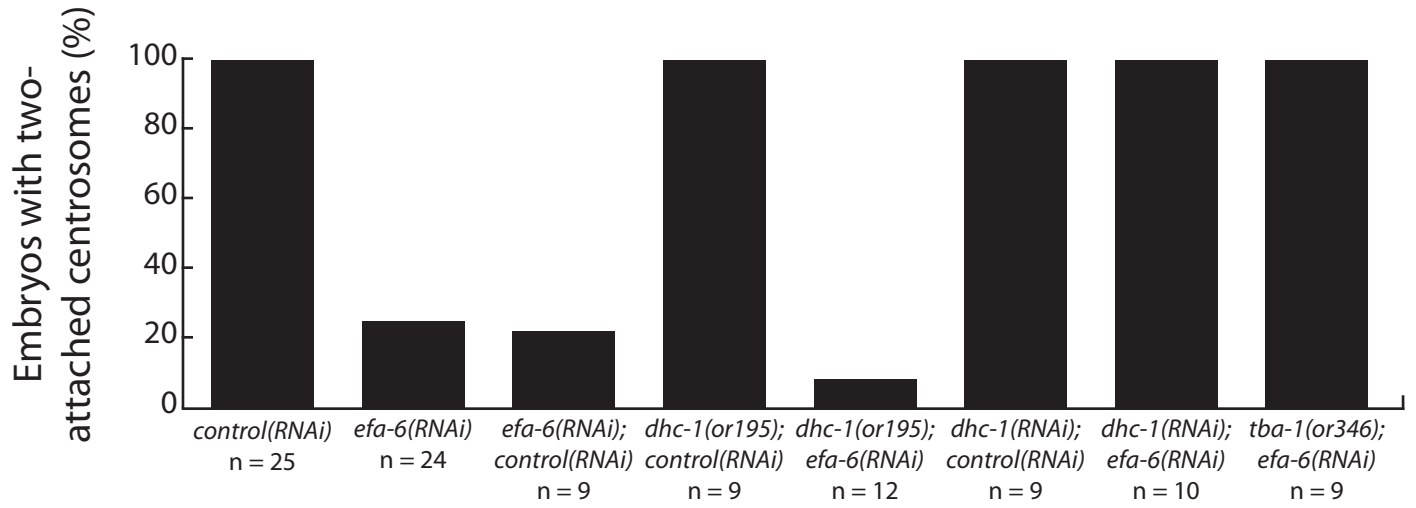

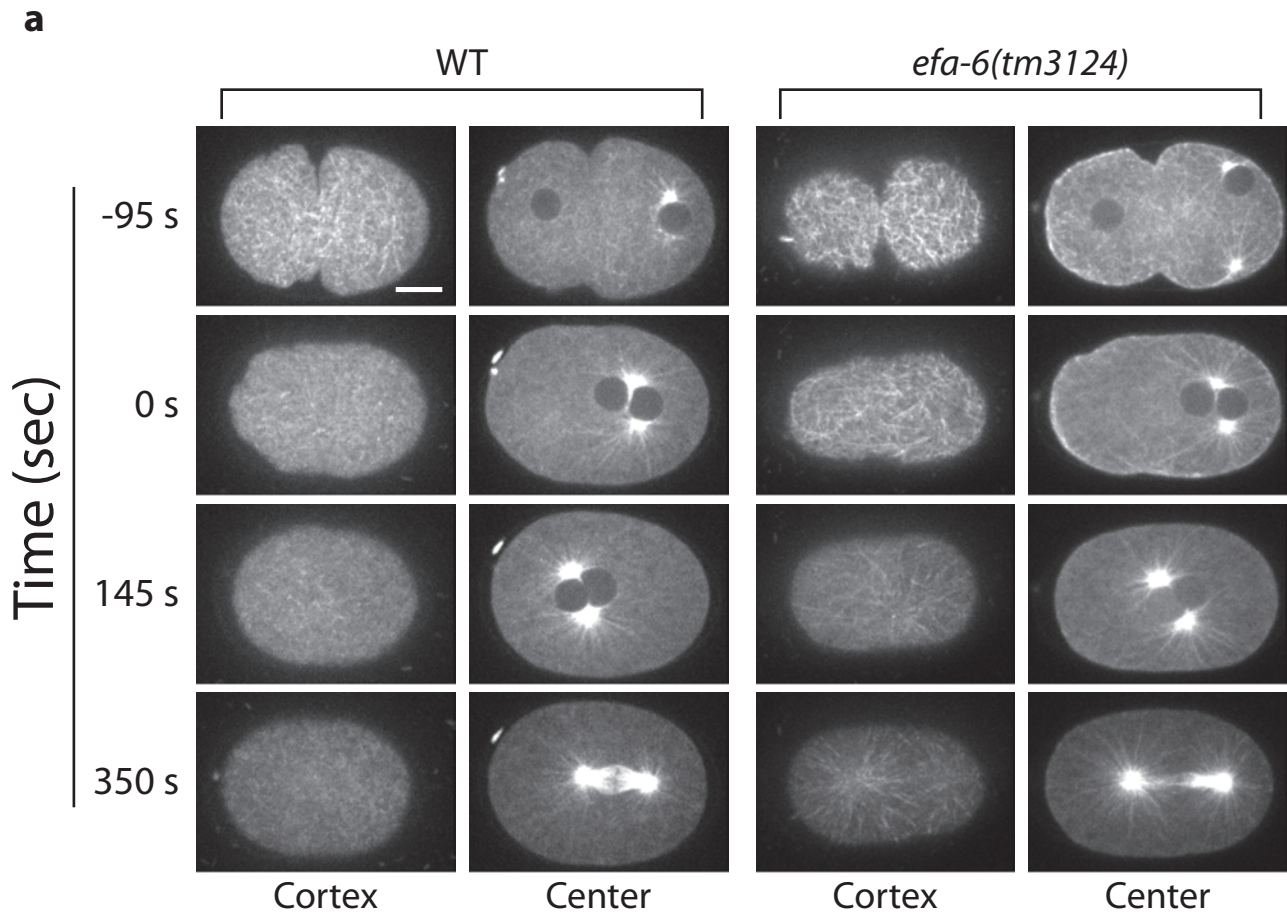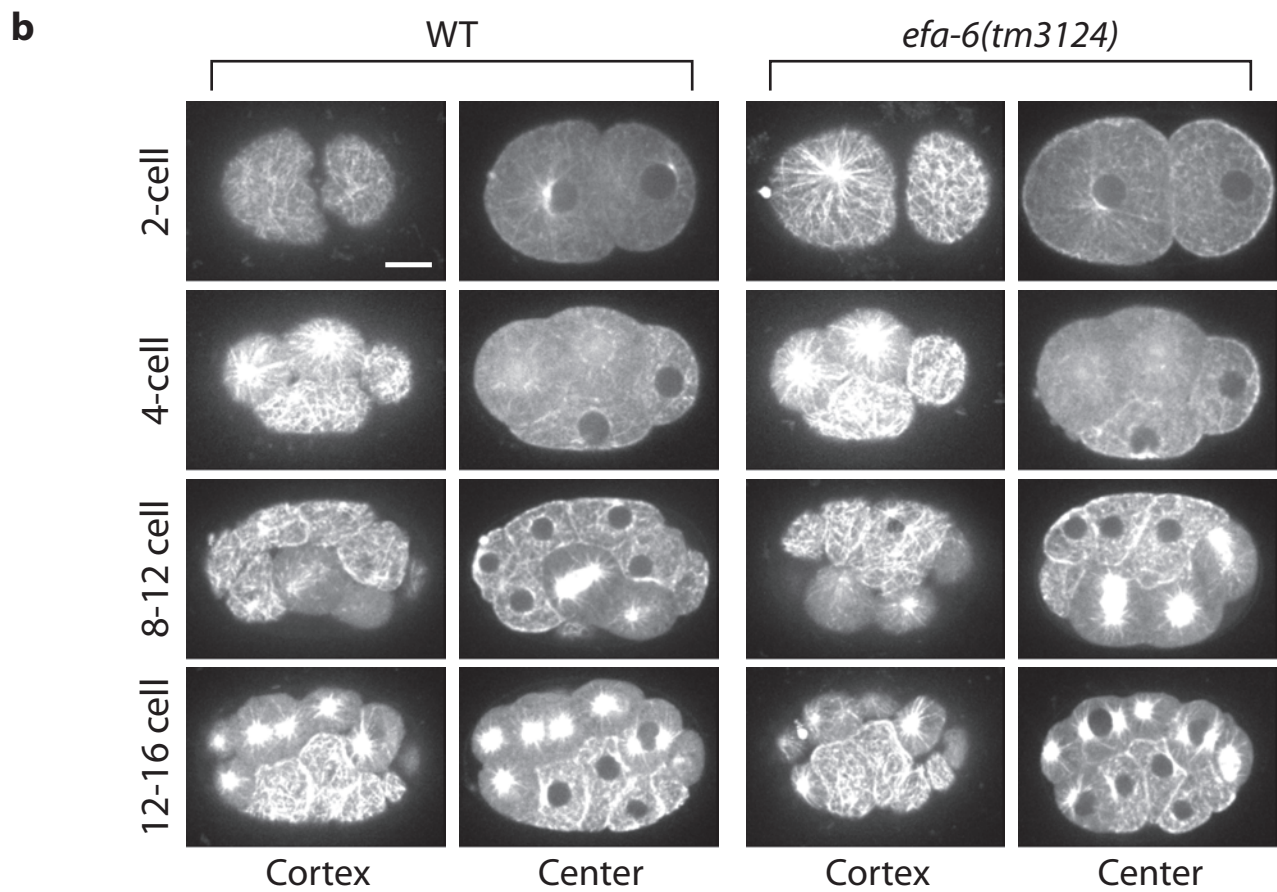

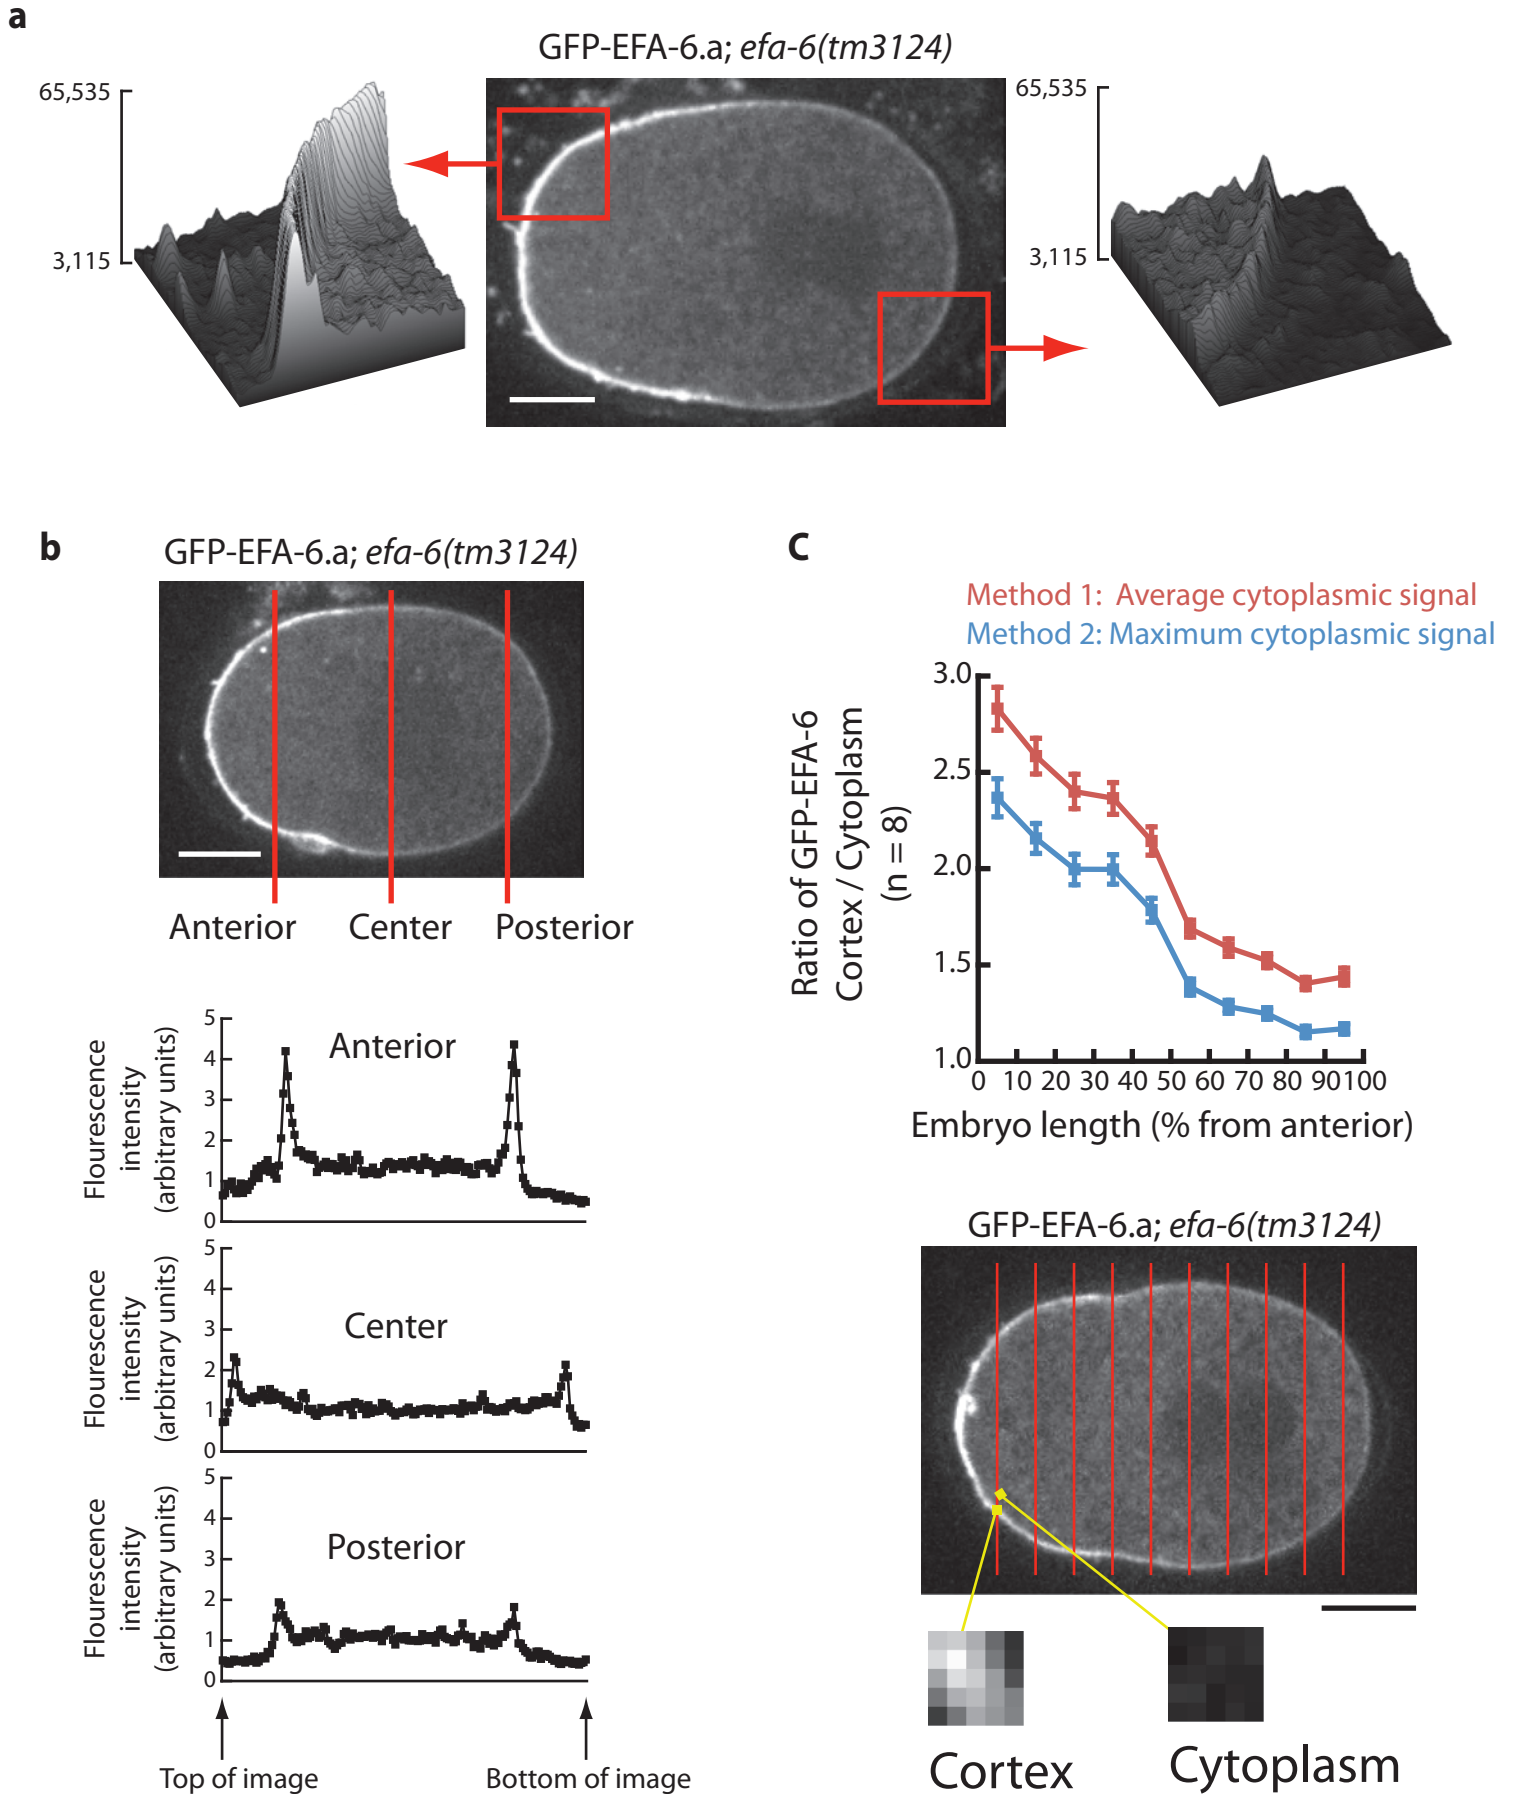

**a**

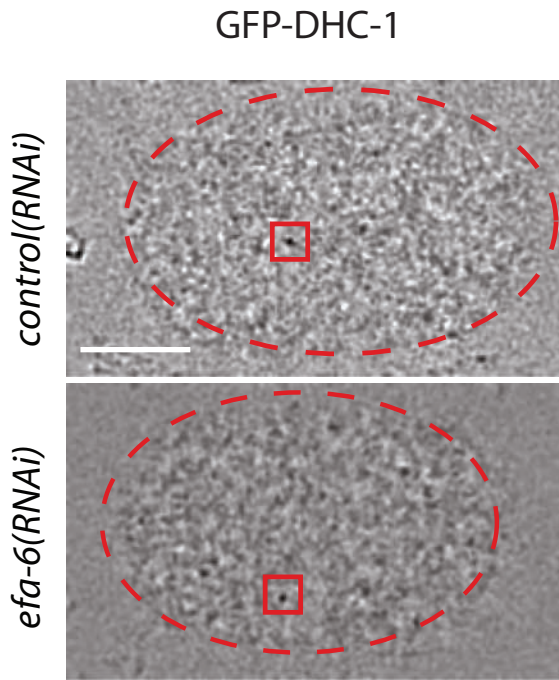

**b**

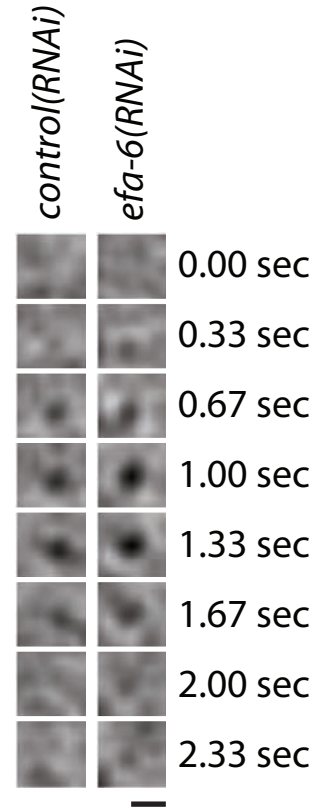

**c**

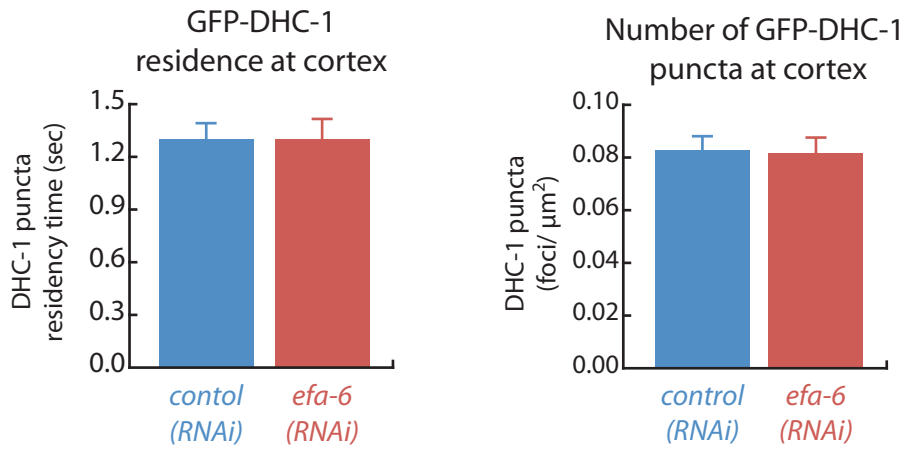



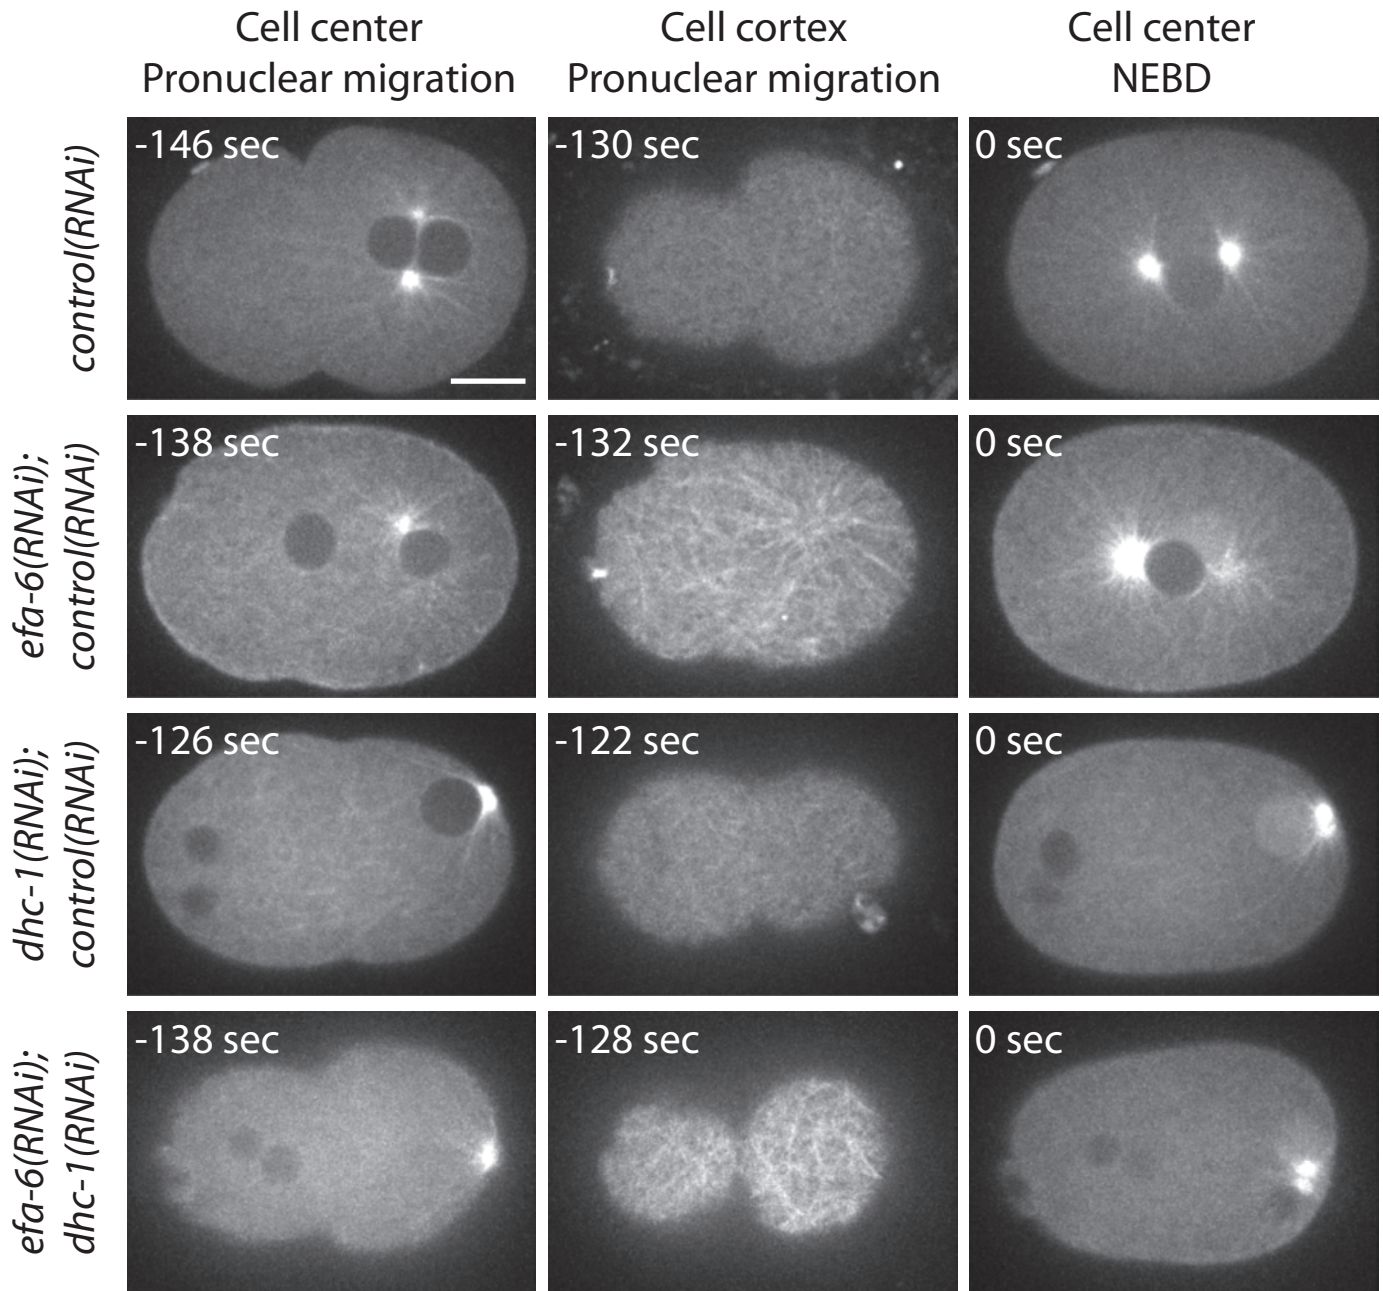

Supplement: NIHMS331117-supplement-01.pdf [file NIHMS331117-supplement-01.pdf]
